# Supplementary material for: Quantitative proteomics reveals that long non-coding RNA MALAT1 interacts with DBC1 to regulate p53 acetylation
Source: PubMed Central journal article supplement — Nucleic Acids Res. 2017 Jul 10;45(17):9947–59. doi: 10.1093/nar/gkx600 (PMC5622371; doi:10.1093/nar/gkx600), 2017-07-10
Supplement: gkx600_supp.pdf [file gkx600_supp.pdf]

## Supplementary Results

Supplementary Table S1. Interfering sequences against MALAT1 and DBC1.

| Name              | Sequence (5'-3')          |
|-------------------|---------------------------|
| shMALAT1-1        | CACCGAAGGCTTAAAGTAG       |
| shMALAT1-2        | CAAAGTCAGATCAGTTATG       |
| Scramble sequence | TCCTAAGGTTAAGTCGCCCTC     |
| shDBC1-1          | CCCATCTGTGACTTCCTAGAA     |
| siMALAT1_1        | CACAGGGAAAGCGAGTGGTTGGTAA |
| siMALAT1_2        | GAG GTGTAAAGGGATTTAT      |

Supplementary Table S2. Sequences of the DNA primers for DBC1 and its fragments cloning.

| Name                | Sequence (5'-3')                                                                            |
|---------------------|---------------------------------------------------------------------------------------------|
| DBC_ N1             | Forward: CCGGAATTCTCCCAGTTTAAGCGCCAGC<br>Reverse: CCGCTCGAGTAGCCAACCTCAGATGCACGGAC          |
| DBC_ N2             | Forward: CCGGAATTCTCCCAGTTTAAGCGCCAGC<br>Reverse: CCGCTCGAGGGGCTGGTTGGAGAGCG                |
| DBC_ N3             | Forward: CCGGAATTCCAGCGGGTCTTCACTGGTATTG<br>Reverse: CCGCTCGAGGGGCTGGTTGGAGAGCG             |
| DBC_ N4             | Forward: CCGGAATTCCCCCTACTGAAGTCCCCAGC<br>Reverse: CCGCTCGAGCCGGCTTGGATGATGGAG              |
| DBC_ C1             | Forward: CCGGAATTCCGGATCCAGGTCTTCTGAAAAG<br>Reverse: CCGCTCGAGGTTGCTAGGTGCCGGCTCC           |
| Full-length<br>DBC1 | Forward: CCGGAATTCGCCACCATGTCCCAGTTTAAGCGCCAG<br>Reverse: AAATATGCGGCCGCGTTGCTAGGTGCCGGCTCC |

Supplementary Table S3. Sequences of the DNA primers for qRT-PCR.

| Name    | Sequence (5'-3')                                                   |
|---------|--------------------------------------------------------------------|
| MALAT1  | Forward: CTCCCACAAGCAACTTCTC<br>Reverse: TTCAACCCACCAAAGACCTC      |
| NEAT1   | Forward:GGCAGGTCTAGTTTGGGCAT<br>Reverse: CCTCATCCCTCCCAGTACCA      |
| DBC1    | Forward: TCCAAGAAACGCAAACAGCG<br>Reverse: TAGCCAACTCAGATGCACGG     |
| DBC1-N1 | Forward: GCACCTCCTCTTCTGCATGT<br>Reverse: CGCTGTTTGCGTTTCTTGGA     |
| DBC1-N2 | Forward: AGCTAAGTGTGGTGAAGGGC<br>Reverse: GAGCGTTTGCACCTTGACAG     |
| DBC1-N3 | Forward: AGCTAAGTGTGGTGAAGGGC<br>Reverse: GAGCGTTTGCACCTTGACAG     |
| DBC1-N4 | Forward: GCACCTCCTCTTCTGCATGT<br>Reverse: CGCTGTTTGCGTTTCTTGGA     |
| DBC1-C1 | Forward: ATCGGAGGCCAAAGGAAAGG<br>Reverse: AAAGCCCATCCTCCTTCAGC     |
| p21     | Forward: GGAGACTCTCAGGGTCGAAA<br>Reverse: TTAGGGCTTCCTCTTGAGAGA    |
| Bax     | Forward: TTGGGACGGCCTCCTCTC<br>Reverse: GCCTCAGCCCATCTTCTTCC       |
| Puma    | Forward: GGGCCCAGACTGTGAATCCT<br>Reverse: ACGTGCTCTCTCTAAACCTATGCA |

|           |                                                                       |
|-----------|-----------------------------------------------------------------------|
| Stat3     | Forward: GAGCTGCACCTGATCACCTT<br>Reverse: GGAGATCACCACAACCTGGCA       |
| Cyclin D1 | Forward: CAGATCATCCGCAAACACGC<br>Reverse: AAGTTGTTGGGGCTCCTCAG        |
| Cyclin E  | Forward: ACAGATTGCAGAGCTGTTGG<br>Reverse: AAGGCCGAAGCAGCAAGTAT        |
| 18S rRNA  | Forward: GCTTAATTTGACTCAACACGGGA<br>Reverse: AGCTATCAATCTGTCAATCCTGTC |
| FLNA      | Forward:TCACCTATACCCCATGGCA<br>Reverse: GTGGCCTTGGTCAGAGAGTC          |
| LDHB      | Forward: TCCGCACGACTGTTACAGAG<br>Reverse: TTGCCTCTTCTTCCGCAACT        |

Supplementary Table S4. Sequences for in vitro transcription of sense and antisense

MALAT1.

| Name            | Sequence (5'-3')                                                                                                      |
|-----------------|-----------------------------------------------------------------------------------------------------------------------|
| sense chain     | Forward:<br>taatacgactcactatagggATGCAAGAAACATTCCAAACAAGCAACAG<br>Reverse:<br>AAATATACCGGTCCTGAAGACAGATTAGTAGTCAAAGCA  |
| antisense chain | Forward:<br>taatacgactcactataggg CCTGAAGACAGATTAGTAGTCAAAGCA<br>Reverse:<br>AAATATACCGGTATGCAAGAAACATTCCAAACAAGCAACAG |

Supplementary Table 5. List of potential MALAT1 interacting proteins identified by SILAC quantitative proteomics.

| Accession # | Description                                                                                                    | Coverage (%) | Unique Peptides | Average ratio <sub>e/M</sub> | s.d. |
|-------------|----------------------------------------------------------------------------------------------------------------|--------------|-----------------|------------------------------|------|
| Q08211      | ATP-dependent RNA helicase A OS=Homo sapiens GN=DHX9 PE=1 SV=4 - [DHX9_HUMAN]                                  | 45.2         | 49              | 0.41                         | 0.12 |
| P51991      | Heterogeneous nuclear ribonucleoprotein A3 OS=Homo sapiens GN=HNRNPA3 PE=1 SV=2 - [ROA3_HUMAN]                 | 36.16        | 26              | 0.17                         | 0.12 |
| P38159      | RNA-binding motif protein, X chromosome OS=Homo sapiens GN=RBMX PE=1 SV=3 - [RBMX_HUMAN]                       | 22.1         | 24              | 0.43                         | 0.17 |
| A0AV96      | RNA-binding protein 47 OS=Homo sapiens GN=RBM47 PE=1 SV=2 - [RBM47_HUMAN]                                      | 20.72        | 23              | 0.01                         | 0.00 |
| P31947      | 14-3-3 protein sigma OS=Homo sapiens GN=SFN PE=1 SV=1 - [1433S_HUMAN]                                          | 46.47        | 22              | 0.50                         | 0.17 |
| P00966      | Argininosuccinate synthase OS=Homo sapiens GN=ASS1 PE=1 SV=2 - [ASSY_HUMAN]                                    | 17.94        | 21              | 0.34                         | 0.05 |
| P82650      | 28S ribosomal protein S22, mitochondrial OS=Homo sapiens GN=MRPS22 PE=1 SV=1 - [RT22_HUMAN]                    | 25.27        | 21              | 0.13                         | 0.02 |
| P28288      | ATP-binding cassette sub-family D member 3 OS=Homo sapiens GN=ABCD3 PE=1 SV=1 - [ABCD3_HUMAN]                  | 19.45        | 19              | 0.32                         | 0.11 |
| Q12906      | Interleukin enhancer-binding factor 3 OS=Homo sapiens GN=ILF3 PE=1 SV=3 - [ILF3_HUMAN]                         | 7.79         | 18              | 0.50                         | 0.03 |
| Q9Y6C9      | Mitochondrial carrier homolog 2 OS=Homo sapiens GN=MTCH2 PE=1 SV=1 - [MTCH2_HUMAN]                             | 28.97        | 18              | 0.15                         | 0.18 |
| O43427      | Acidic fibroblast growth factor intracellular-binding protein OS=Homo sapiens GN=FIBP PE=1 SV=3 - [FIBP_HUMAN] | 51.28        | 17              | 0.23                         | 0.03 |
| P05166      | Propionyl-CoA carboxylase beta chain, mitochondrial OS=Homo sapiens GN=PCCB PE=1 SV=3 - [PCCB_HUMAN]           | 51.28        | 17              | 0.32                         | 0.09 |
| O43390      | Heterogeneous nuclear ribonucleoprotein R                                                                      | 35.62        | 15              | 0.63                         | 0.05 |

|        |                                                                                                                |       |    |      |      |
|--------|----------------------------------------------------------------------------------------------------------------|-------|----|------|------|
|        | OS=Homo sapiens GN=HNRNPR PE=1<br>SV=1 - [HNRPR_HUMAN]                                                         |       |    |      |      |
| Q9Y6M1 | Insulin-like growth factor 2 mRNA-binding protein 2 OS=Homo sapiens GN=IGF2BP2 PE=1 SV=2 - [IF2B2_HUMAN]       | 23.92 | 15 | 0.01 | 0.00 |
| P11413 | Glucose-6-phosphate 1-dehydrogenase OS=Homo sapiens GN=G6PD PE=1 SV=4 - [G6PD_HUMAN]                           | 34.91 | 14 | 0.03 | 0.03 |
| P24928 | DNA-directed RNA polymerase II subunit RPB1 OS=Homo sapiens GN=POLR2A PE=1 SV=2 - [RPB1_HUMAN]                 | 31.76 | 14 | 0.20 | 0.01 |
| Q13867 | Bleomycin hydrolase OS=Homo sapiens GN=BLMH PE=1 SV=1 - [BLMH_HUMAN]                                           | 15.56 | 14 | 0.01 | 0.00 |
| Q9Y285 | Phenylalanine--tRNA ligase alpha subunit OS=Homo sapiens GN=FARSA PE=1 SV=3 - [SYFA_HUMAN]                     | 32.84 | 14 | 0.06 | 0.09 |
| P43686 | 26S protease regulatory subunit 6B OS=Homo sapiens GN=PSMC4 PE=1 SV=2 - [PRS6B_HUMAN]                          | 15.27 | 13 | 0.48 | 0.01 |
| Q9NZB2 | Constitutive coactivator of PPAR-gamma-like protein 1 OS=Homo sapiens GN=FAM120A PE=1 SV=2 - [F120A_HUMAN]     | 44.44 | 13 | 0.41 | 0.11 |
| Q15393 | Splicing factor 3B subunit 3 OS=Homo sapiens GN=SF3B3 PE=1 SV=4 - [SF3B3_HUMAN]                                | 29.25 | 12 | 0.01 | 0.00 |
| Q15428 | Splicing factor 3A subunit 2 OS=Homo sapiens GN=SF3A2 PE=1 SV=2 - [SF3A2_HUMAN]                                | 14.63 | 12 | 0.22 | 0.12 |
| Q96QR8 | Transcriptional activator protein Pur-beta OS=Homo sapiens GN=PURB PE=1 SV=3 - [PURB_HUMAN]                    | 55.52 | 12 | 0.11 | 0.01 |
| Q13501 | Sequestosome-1 OS=Homo sapiens GN=SQSTM1 PE=1 SV=1 - [SQSTM_HUMAN]                                             | 28.64 | 11 | 0.30 | 0.20 |
| Q1KMD3 | Heterogeneous nuclear ribonucleoprotein U-like protein 2 OS=Homo sapiens GN=HNRNPUL2 PE=1 SV=1 - [HNRL2_HUMAN] | 16.84 | 11 | 0.22 | 0.08 |
| Q6P2Q9 | Pre-mRNA-processing-splicing factor 8 OS=Homo sapiens GN=PRPF8 PE=1 SV=2 - [PRP8_HUMAN]                        | 38.53 | 11 | 0.01 | 0.00 |
| Q9Y2X3 | Nucleolar protein 58 OS=Homo sapiens                                                                           | 26.32 | 11 | 0.34 | 0.06 |

|        |                                                                                                            |       |    |      |      |
|--------|------------------------------------------------------------------------------------------------------------|-------|----|------|------|
|        | GN=NOP58 PE=1 SV=1 -<br>[NOP58_HUMAN]                                                                      |       |    |      |      |
| P10155 | 60 kDa SS-A/Ro ribonucleoprotein<br>OS=Homo sapiens GN=TROVE2 PE=1<br>SV=2 - [RO60_HUMAN]                  | 14.84 | 10 | 0.07 | 0.12 |
| P52597 | Heterogeneous nuclear ribonucleoprotein F<br>OS=Homo sapiens GN=HNRNPF PE=1<br>SV=3 - [HNRNPF_HUMAN]       | 30    | 10 | 0.44 | 0.08 |
| Q9H5Q4 | Dimethyladenosine transferase 2,<br>mitochondrial OS=Homo sapiens<br>GN=TFB2M PE=1 SV=1 -<br>[TFB2M_HUMAN] | 26.55 | 10 | 0.39 | 0.11 |
| P0CG48 | Polyubiquitin-C OS=Homo sapiens<br>GN=UBC PE=1 SV=3 - [UBC_HUMAN]                                          | 11.64 | 9  | 0.12 | 0.02 |
| P26599 | Polypyrimidine tract-binding protein 1<br>OS=Homo sapiens GN=PTBP1 PE=1 SV=1 -<br>[PTBP1_HUMAN]            | 17.22 | 9  | 0.29 | 0.03 |
| Q15717 | ELAV-like protein 1 OS=Homo sapiens<br>GN=ELAVL1 PE=1 SV=2 -<br>[ELAV1_HUMAN]                              | 25.08 | 9  | 0.50 | 0.19 |
| Q16629 | Serine/arginine-rich splicing factor 7<br>OS=Homo sapiens GN=SRSF7 PE=1 SV=1 -<br>[SRSF7_HUMAN]            | 15.22 | 9  | 0.01 | 0.00 |
| Q8TDD1 | ATP-dependent RNA helicase DDX54<br>OS=Homo sapiens GN=DDX54 PE=1 SV=2<br>- [DDX54_HUMAN]                  | 19.26 | 9  | 0.35 | 0.15 |
| P82933 | 28S ribosomal protein S9, mitochondrial<br>OS=Homo sapiens GN=MRPS9 PE=1 SV=2<br>- [RT09_HUMAN]            | 26.6  | 8  | 0.18 | 0.09 |
| Q13263 | Transcription intermediary factor 1-beta<br>OS=Homo sapiens GN=TRIM28 PE=1 SV=5<br>- [TIF1B_HUMAN]         | 10.74 | 8  | 0.45 | 0.06 |
| Q15459 | Splicing factor 3A subunit 1 OS=Homo<br>sapiens GN=SF3A1 PE=1 SV=1 -<br>[SF3A1_HUMAN]                      | 35.14 | 8  | 0.13 | 0.10 |
| Q9H0J9 | Poly [ADP-ribose] polymerase 12 OS=Homo<br>sapiens GN=PARP12 PE=1 SV=1 -<br>[PAR12_HUMAN]                  | 10.98 | 8  | 0.49 | 0.00 |
| P62805 | Histone H4 OS=Homo sapiens<br>GN=HIST1H4A PE=1 SV=2 -<br>[H4_HUMAN]                                        | 15.8  | 7  | 0.01 | 0.00 |
| Q01081 | Splicing factor U2AF 35 kDa subunit<br>OS=Homo sapiens GN=U2AF1 PE=1 SV=3<br>- [U2AF1_HUMAN]               | 13.98 | 7  | 0.08 | 0.06 |



|        |                                                                                                                                           |       |   |      |      |
|--------|-------------------------------------------------------------------------------------------------------------------------------------------|-------|---|------|------|
| Q04760 | Lactoylglutathione lyase OS=Homo sapiens<br>GN=GLO1 PE=1 SV=4 - [LGUL_HUMAN]                                                              | 24.58 | 7 | 0.02 | 0.01 |
| Q96I24 | Far upstream element-binding protein 3<br>OS=Homo sapiens GN=FUBP3 PE=1 SV=2<br>- [FUBP3_HUMAN]                                           | 18.03 | 7 | 0.09 | 0.01 |
| Q9BUQ8 | Probable ATP-dependent RNA helicase<br>DDX23 OS=Homo sapiens GN=DDX23<br>PE=1 SV=3 - [DDX23_HUMAN]                                        | 17.56 | 7 | 0.14 | 0.01 |
| Q9C0J8 | pre-mRNA 3' end processing protein WDR33<br>OS=Homo sapiens GN=WDR33 PE=1 SV=2<br>- [WDR33_HUMAN]                                         | 18.41 | 7 | 0.02 | 0.02 |
| O75400 | Pre-mRNA-processing factor 40 homolog A<br>OS=Homo sapiens GN=PRPF40A PE=1<br>SV=2 - [PR40A_HUMAN]                                        | 26.07 | 6 | 0.01 | 0.00 |
| O75533 | Splicing factor 3B subunit 1 OS=Homo<br>sapiens GN=SF3B1 PE=1 SV=3 -<br>[SF3B1_HUMAN]                                                     | 17.17 | 6 | 0.42 | 0.03 |
| P05089 | Arginase-1 OS=Homo sapiens GN=ARG1<br>PE=1 SV=2 - [ARGI1_HUMAN]                                                                           | 17.34 | 6 | 0.37 | 0.19 |
| P07910 | Heterogeneous nuclear ribonucleoproteins<br>C1/C2 OS=Homo sapiens GN=HNRNPC<br>PE=1 SV=4 - [HNRPC_HUMAN]                                  | 10.9  | 6 | 0.24 | 0.02 |
| P10599 | Thioredoxin OS=Homo sapiens GN=TXN<br>PE=1 SV=3 - [THIO_HUMAN]                                                                            | 34.22 | 6 | 0.25 | 0.19 |
| P17980 | 26S protease regulatory subunit 6A<br>OS=Homo sapiens GN=PSMC3 PE=1 SV=3<br>- [PRS6A_HUMAN]                                               | 11.51 | 6 | 0.34 | 0.09 |
| P28331 | NADH-ubiquinone oxidoreductase 75 kDa<br>subunit, mitochondrial OS=Homo sapiens<br>GN=NDUFS1 PE=1 SV=3 -<br>[NDUS1_HUMAN]                 | 21.43 | 6 | 0.20 | 0.15 |
| P55265 | Double-stranded RNA-specific adenosine<br>deaminase OS=Homo sapiens GN=ADAR<br>PE=1 SV=4 - [DSRAD_HUMAN]                                  | 38.03 | 6 | 0.01 | 0.00 |
| P82673 | 28S ribosomal protein S35, mitochondrial<br>OS=Homo sapiens GN=MRPS35 PE=1<br>SV=1 - [RT35_HUMAN]                                         | 12.56 | 6 | 0.37 | 0.04 |
| Q07666 | KH domain-containing, RNA-binding, signal<br>transduction-associated protein 1 OS=Homo<br>sapiens GN=KHDRBS1 PE=1 SV=1 -<br>[KHDR1_HUMAN] | 23.53 | 6 | 0.33 | 0.12 |
| Q13151 | Heterogeneous nuclear ribonucleoprotein A0<br>OS=Homo sapiens GN=HNRNPA0 PE=1<br>SV=1 - [ROA0_HUMAN]                                      | 25.6  | 6 | 0.13 | 0.16 |

|        |                                                                                                                             |       |   |      |      |
|--------|-----------------------------------------------------------------------------------------------------------------------------|-------|---|------|------|
| Q15738 | Sterol-4-alpha-carboxylate 3-dehydrogenase, decarboxylating OS=Homo sapiens<br>GN=NSDHL PE=1 SV=2 -<br>[NSDHL_HUMAN]        | 17.84 | 6 | 0.21 | 0.08 |
| Q96SI9 | Spermatid perinuclear RNA-binding protein OS=Homo sapiens GN=STRBP PE=1 SV=1<br>- [STRBP_HUMAN]                             | 19.76 | 6 | 0.01 | 0.00 |
| Q9BRZ2 | E3 ubiquitin-protein ligase TRIM56 OS=Homo sapiens GN=TRIM56 PE=1 SV=3<br>- [TRIM56_HUMAN]                                  | 35.41 | 6 | 0.42 | 0.12 |
| Q9NY93 | Probable ATP-dependent RNA helicase DDX56 OS=Homo sapiens GN=DDX56<br>PE=1 SV=1 - [DDX56_HUMAN]                             | 46.83 | 6 | 0.44 | 0.07 |
| Q9Y2T2 | AP-3 complex subunit mu-1 OS=Homo sapiens GN=AP3M1 PE=1 SV=1 -<br>[AP3M1_HUMAN]                                             | 10.29 | 6 | 0.15 | 0.18 |
| A6NMY6 | Putative annexin A2-like protein OS=Homo sapiens GN=ANXA2P2 PE=5 SV=2 -<br>[AXA2L_HUMAN]                                    | 17.94 | 5 | 0.15 | 0.10 |
| O76031 | ATP-dependent Clp protease ATP-binding subunit clpX-like, mitochondrial OS=Homo sapiens GN=CLPX PE=1 SV=2 -<br>[CLPX_HUMAN] | 58.1  | 5 | 0.31 | 0.05 |
| O95433 | Activator of 90 kDa heat shock protein ATPase homolog 1 OS=Homo sapiens<br>GN=AHSA1 PE=1 SV=1 -<br>[AHSA1_HUMAN]            | 6.07  | 5 | 0.15 | 0.06 |
| Q06830 | Peroxiredoxin-1 OS=Homo sapiens GN=PRDX1 PE=1 SV=1 -<br>[PRDX1_HUMAN]                                                       | 14.75 | 5 | 0.50 | 0.14 |
| Q10570 | Cleavage and polyadenylation specificity factor subunit 1 OS=Homo sapiens<br>GN=CPSF1 PE=1 SV=2 -<br>[CPSF1_HUMAN]          | 18.23 | 5 | 0.16 | 0.03 |
| Q14498 | RNA-binding protein 39 OS=Homo sapiens GN=RBM39 PE=1 SV=2 -<br>[RBM39_HUMAN]                                                | 15.03 | 5 | 0.15 | 0.16 |
| Q96DV4 | 39S ribosomal protein L38, mitochondrial OS=Homo sapiens GN=MRPL38 PE=1<br>SV=2 - [RM38_HUMAN]                              | 4.88  | 5 | 0.01 | 0.00 |
| Q96KK5 | Histone H2A type 1-H OS=Homo sapiens GN=HIST1H2AH PE=1 SV=3 -<br>[H2A1H_HUMAN]                                              | 9.09  | 5 | 0.35 | 0.16 |
| Q9NSD9 | Phenylalanine--tRNA ligase beta subunit                                                                                     | 11.09 | 5 | 0.40 | 0.09 |

|        |                                                                                                          |       |   |      |      |
|--------|----------------------------------------------------------------------------------------------------------|-------|---|------|------|
|        | OS=Homo sapiens GN=FARSB PE=1 SV=3<br>- [SYFB_HUMAN]                                                     |       |   |      |      |
| O94906 | Pre-mRNA-processing factor 6 OS=Homo sapiens GN=PRPF6 PE=1 SV=1 - [PRP6_HUMAN]                           | 10.62 | 4 | 0.35 | 0.03 |
| O95793 | Double-stranded RNA-binding protein Staufen homolog 1 OS=Homo sapiens GN=STAU1 PE=1 SV=2 - [STAU1_HUMAN] | 3.47  | 4 | 0.09 | 0.01 |
| P22626 | Heterogeneous nuclear ribonucleoproteins A2/B1 OS=Homo sapiens GN=HNRNPA2B1 PE=1 SV=2 - [ROA2_HUMAN]     | 3.47  | 4 | 0.41 | 0.19 |
| P25705 | ATP synthase subunit alpha, mitochondrial OS=Homo sapiens GN=ATP5A1 PE=1 SV=1 - [ATPA_HUMAN]             | 27.78 | 4 | 0.02 | 0.02 |
| P26368 | Splicing factor U2AF 65 kDa subunit OS=Homo sapiens GN=U2AF2 PE=1 SV=4 - [U2AF2_HUMAN]                   | 15.83 | 4 | 0.01 | 0.00 |
| P33993 | DNA replication licensing factor MCM7 OS=Homo sapiens GN=MCM7 PE=1 SV=4 - [MCM7_HUMAN]                   | 17.7  | 4 | 0.46 | 0.14 |
| P43243 | Matrin-3 OS=Homo sapiens GN=MATR3 PE=1 SV=2 - [MATR3_HUMAN]                                              | 10.62 | 4 | 0.35 | 0.12 |
| Q12874 | Splicing factor 3A subunit 3 OS=Homo sapiens GN=SF3A3 PE=1 SV=1 - [SF3A3_HUMAN]                          | 5.42  | 4 | 0.35 | 0.20 |
| Q12905 | Interleukin enhancer-binding factor 2 OS=Homo sapiens GN=ILF2 PE=1 SV=2 - [ILF2_HUMAN]                   | 9.69  | 4 | 0.46 | 0.11 |
| Q6UN15 | Pre-mRNA 3'-end-processing factor FIP1 OS=Homo sapiens GN=FIP1L1 PE=1 SV=1 - [FIP1_HUMAN]                | 12.61 | 4 | 0.24 | 0.03 |
| Q8IWZ3 | Ankyrin repeat and KH domain-containing protein 1 OS=Homo sapiens GN=ANKHD1 PE=1 SV=1 - [ANKH1_HUMAN]    | 17.7  | 4 | 0.01 | 0.00 |
| Q92552 | 28S ribosomal protein S27, mitochondrial OS=Homo sapiens GN=MRPS27 PE=1 SV=3 - [RT27_HUMAN]              | 6.19  | 4 | 0.12 | 0.01 |
| Q9BVI4 | Nucleolar complex protein 4 homolog OS=Homo sapiens GN=NOC4L PE=1 SV=1 - [NOC4L_HUMAN]                   | 5.42  | 4 | 0.44 | 0.13 |
| Q9H0D6 | 5'-3' exoribonuclease 2 OS=Homo sapiens GN=XRN2 PE=1 SV=1 - [XRN2_HUMAN]                                 | 27.78 | 4 | 0.28 | 0.13 |

|        |                                                                                                              |       |   |      |      |
|--------|--------------------------------------------------------------------------------------------------------------|-------|---|------|------|
| Q9P2I0 | Cleavage and polyadenylation specificity factor subunit 2 OS=Homo sapiens GN=CPSF2 PE=1 SV=2 - [CPSF2_HUMAN] | 8.86  | 4 | 0.01 | 0.00 |
| Q9Y2P8 | RNA 3'-terminal phosphate cyclase-like protein OS=Homo sapiens GN=RCL1 PE=1 SV=3 - [RCL1_HUMAN]              | 15.83 | 4 | 0.24 | 0.00 |
| O60814 | Histone H2B type 1-K OS=Homo sapiens GN=HIST1H2BK PE=1 SV=3 - [H2B1K_HUMAN]                                  | 16.86 | 3 | 0.01 | 0.00 |
| O95400 | CD2 antigen cytoplasmic tail-binding protein 2 OS=Homo sapiens GN=CD2BP2 PE=1 SV=1 - [CD2B2_HUMAN]           | 22.58 | 3 | 0.25 | 0.08 |
| P04406 | Glyceraldehyde-3-phosphate dehydrogenase OS=Homo sapiens GN=GAPDH PE=1 SV=3 - [G3P_HUMAN]                    | 11.98 | 3 | 0.01 | 0.00 |
| P31943 | Heterogeneous nuclear ribonucleoprotein H OS=Homo sapiens GN=HNRNPH1 PE=1 SV=4 - [HNRH1_HUMAN]               | 12.81 | 3 | 0.45 | 0.01 |
| P46777 | 60S ribosomal protein L5 OS=Homo sapiens GN=RPL5 PE=1 SV=3 - [RL5_HUMAN]                                     | 1.59  | 3 | 0.01 | 0.00 |
| P51398 | 28S ribosomal protein S29, mitochondrial OS=Homo sapiens GN=DAP3 PE=1 SV=1 - [RT29_HUMAN]                    | 1.59  | 3 | 0.32 | 0.19 |
| P52272 | Heterogeneous nuclear ribonucleoprotein M OS=Homo sapiens GN=HNRNPM PE=1 SV=3 - [HNRPM_HUMAN]                | 16.86 | 3 | 0.50 | 0.18 |
| P63244 | Guanine nucleotide-binding protein subunit beta-2-like 1 OS=Homo sapiens GN=GNB2L1 PE=1 SV=3 - [GBLP_HUMAN]  | 6.4   | 3 | 0.42 | 0.14 |
| Q08188 | Protein-glutamine gamma-glutamyltransferase E OS=Homo sapiens GN=TGM3 PE=1 SV=4 - [TGM3_HUMAN]               | 16.86 | 3 | 0.42 | 0.12 |
| Q5JTH9 | RRP12-like protein OS=Homo sapiens GN=RRP12 PE=1 SV=2 - [RRP12_HUMAN]                                        | 8.79  | 3 | 0.25 | 0.07 |
| Q5U7I5 | Transthyretin OS=Pan troglodytes GN=TTR PE=2 SV=1 - [TTHY_PANTR]                                             | 44.67 | 3 | 0.44 | 0.08 |
| Q8N163 | Cell cycle and apoptosis regulator protein 2 OS=Homo sapiens GN=CCAR2 PE=1 SV=2 - [CCAR2_HUMAN]              | 3.66  | 3 | 0.08 | 0.11 |
| Q92621 | Nuclear pore complex protein Nup205                                                                          | 4.22  | 3 | 0.01 | 0.00 |

|        |                                                                                                                        |       |   |      |      |
|--------|------------------------------------------------------------------------------------------------------------------------|-------|---|------|------|
|        | OS=Homo sapiens GN=NUP205 PE=1 SV=3<br>- [NUP205_HUMAN]                                                                |       |   |      |      |
| Q96EY7 | Pentatricopeptide repeat domain-containing protein 3, mitochondrial OS=Homo sapiens GN=PTCD3 PE=1 SV=3 - [PTCD3_HUMAN] | 6.84  | 3 | 0.30 | 0.01 |
| Q96KR1 | Zinc finger RNA-binding protein OS=Homo sapiens GN=ZFR PE=1 SV=2 - [ZFR_HUMAN]                                         | 6.57  | 3 | 0.16 | 0.09 |
| Q96P63 | Serpin B12 OS=Homo sapiens GN=SERPINB12 PE=1 SV=1 - [SPB12_HUMAN]                                                      | 3.34  | 3 | 0.01 | 0.00 |
| Q99729 | Heterogeneous nuclear ribonucleoprotein A/B OS=Homo sapiens GN=HNRNPAB PE=1 SV=2 - [ROAA_HUMAN]                        | 7.8   | 3 | 0.33 | 0.19 |
| Q9H0U9 | Testis-specific Y-encoded-like protein 1 OS=Homo sapiens GN=TSPYL1 PE=1 SV=3 - [TSYL1_HUMAN]                           | 4.35  | 3 | 0.41 | 0.10 |
| Q9Y4W2 | Ribosomal biogenesis protein LAS1L OS=Homo sapiens GN=LAS1L PE=1 SV=2 - [LAS1L_HUMAN]                                  | 6.57  | 3 | 0.09 | 0.04 |
| Q9Y678 | Coatamer subunit gamma-1 OS=Homo sapiens GN=COPG1 PE=1 SV=1 - [COPG1_HUMAN]                                            | 27.34 | 3 | 0.24 | 0.20 |
| O00442 | RNA 3'-terminal phosphate cyclase OS=Homo sapiens GN=RTCA PE=1 SV=1 - [RTCA_HUMAN]                                     | 6.59  | 2 | 0.01 | 0.00 |
| O00635 | E3 ubiquitin-protein ligase TRIM38 OS=Homo sapiens GN=TRIM38 PE=1 SV=1 - [TRI38_HUMAN]                                 | 7.1   | 2 | 0.05 | 0.04 |
| O60832 | H/ACA ribonucleoprotein complex subunit 4 OS=Homo sapiens GN=DKC1 PE=1 SV=3 - [DKC1_HUMAN]                             | 6.83  | 2 | 0.01 | 0.00 |
| P02765 | Alpha-2-HS-glycoprotein OS=Homo sapiens GN=AHSG PE=1 SV=1 - [FETUA_HUMAN]                                              | 3.88  | 2 | 0.15 | 0.17 |
| P02788 | Lactotransferrin OS=Homo sapiens GN=LTF PE=1 SV=6 - [TRFL_HUMAN]                                                       | 2.13  | 2 | 0.01 | 0.00 |
| P05165 | Propionyl-CoA carboxylase alpha chain, mitochondrial OS=Homo sapiens GN=PCCA PE=1 SV=4 - [PCCA_HUMAN]                  | 4.29  | 2 | 0.33 | 0.08 |
| P11182 | Lipoamide acyltransferase component of branched-chain alpha-keto acid dehydrogenase complex, mitochondrial             | 9.52  | 2 | 0.44 | 0.13 |

|        |                                                                                                                         |       |   |      |      |
|--------|-------------------------------------------------------------------------------------------------------------------------|-------|---|------|------|
|        | OS=Homo sapiens GN=DBT PE=1 SV=3 -<br>[ODB2_HUMAN]                                                                      |       |   |      |      |
| P13804 | Electron transfer flavoprotein subunit alpha,<br>mitochondrial OS=Homo sapiens GN=ETFA<br>PE=1 SV=1 - [ETFA_HUMAN]      | 3.54  | 2 | 0.12 | 0.04 |
| P17655 | Calpain-2 catalytic subunit OS=Homo<br>sapiens GN=CAPN2 PE=1 SV=6 -<br>[CAN2_HUMAN]                                     | 18.48 | 2 | 0.04 | 0.02 |
| P19387 | DNA-directed RNA polymerase II subunit<br>RPB3 OS=Homo sapiens GN=POLR2C<br>PE=1 SV=2 - [RPB3_HUMAN]                    | 10.11 | 2 | 0.39 | 0.14 |
| P31944 | Caspase-14 OS=Homo sapiens GN=CASP14<br>PE=1 SV=2 - [CASPE_HUMAN]                                                       | 3.17  | 2 | 0.41 | 0.06 |
| P32119 | Peroxiredoxin-2 OS=Homo sapiens<br>GN=PRDX2 PE=1 SV=5 -<br>[PRDX2_HUMAN]                                                | 6.83  | 2 | 0.44 | 0.08 |
| P51649 | Succinate-semialdehyde dehydrogenase,<br>mitochondrial OS=Homo sapiens<br>GN=ALDH5A1 PE=1 SV=2 -<br>[SSDH_HUMAN]        | 1.57  | 2 | 0.07 | 0.01 |
| P62195 | 26S protease regulatory subunit 8 OS=Homo<br>sapiens GN=PSMC5 PE=1 SV=1 -<br>[PRS8_HUMAN]                               | 2.78  | 2 | 0.40 | 0.13 |
| P62995 | Transformer-2 protein homolog beta<br>OS=Homo sapiens GN=TRA2B PE=1 SV=1<br>- [TRA2B_HUMAN]                             | 3.37  | 2 | 0.01 | 0.00 |
| Q00577 | Transcriptional activator protein Pur-alpha<br>OS=Homo sapiens GN=PURA PE=1 SV=2 -<br>[PURA_HUMAN]                      | 6.83  | 2 | 0.15 | 0.07 |
| Q16836 | Hydroxyacyl-coenzyme A dehydrogenase,<br>mitochondrial OS=Homo sapiens<br>GN=HADH PE=1 SV=3 -<br>[HCDH_HUMAN]           | 7.29  | 2 | 0.30 | 0.08 |
| Q8N1F7 | Nuclear pore complex protein Nup93<br>OS=Homo sapiens GN=NUP93 PE=1 SV=2<br>- [NUP93_HUMAN]                             | 2.96  | 2 | 0.03 | 0.03 |
| Q8WVV4 | Protein POF1B OS=Homo sapiens<br>GN=POF1B PE=1 SV=3 -<br>[POF1B_HUMAN]                                                  | 0.28  | 2 | 0.35 | 0.05 |
| Q96RQ3 | Methylcrotonoyl-CoA carboxylase subunit<br>alpha, mitochondrial OS=Homo sapiens<br>GN=MCCC1 PE=1 SV=3 -<br>[MCCA_HUMAN] | 3.31  | 2 | 0.01 | 0.00 |
| Q9BZE1 | 39S ribosomal protein L37, mitochondrial                                                                                | 3.57  | 2 | 0.39 | 0.10 |

OS=Homo sapiens GN=MRPL37 PE=1  
SV=2 - [RM37\_HUMAN]

---

The protein sequence information was obtained from the Uniprot Database.

Supplementary Figure S1.

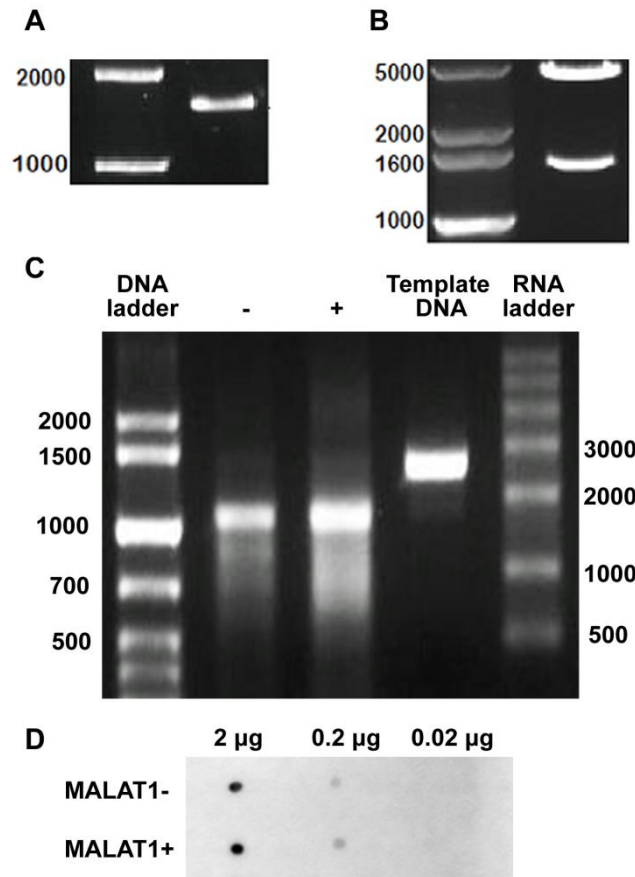

Supplementary Figure S1. *In vitro* transcription of the sense and antisense MALAT1. (A) The fragment 6918-8441 nt of MALAT1 gene was amplified by PCR. (B) Enzymatic restriction analysis confirmed that the fragment 6918-8441 nt of MALAT1 was inserted into the pcDNA3.1(+) vector correctly. (C) Agarose gel electrophoresis separation of the *in vitro* transcribed sense and antisense MALAT1. The bands of MALAT1 and its DNA template were visualized with EB staining. (D) Biotin-HRP dot blot analysis of the sense and antisense MALAT1.



Supplementary Figure S2.

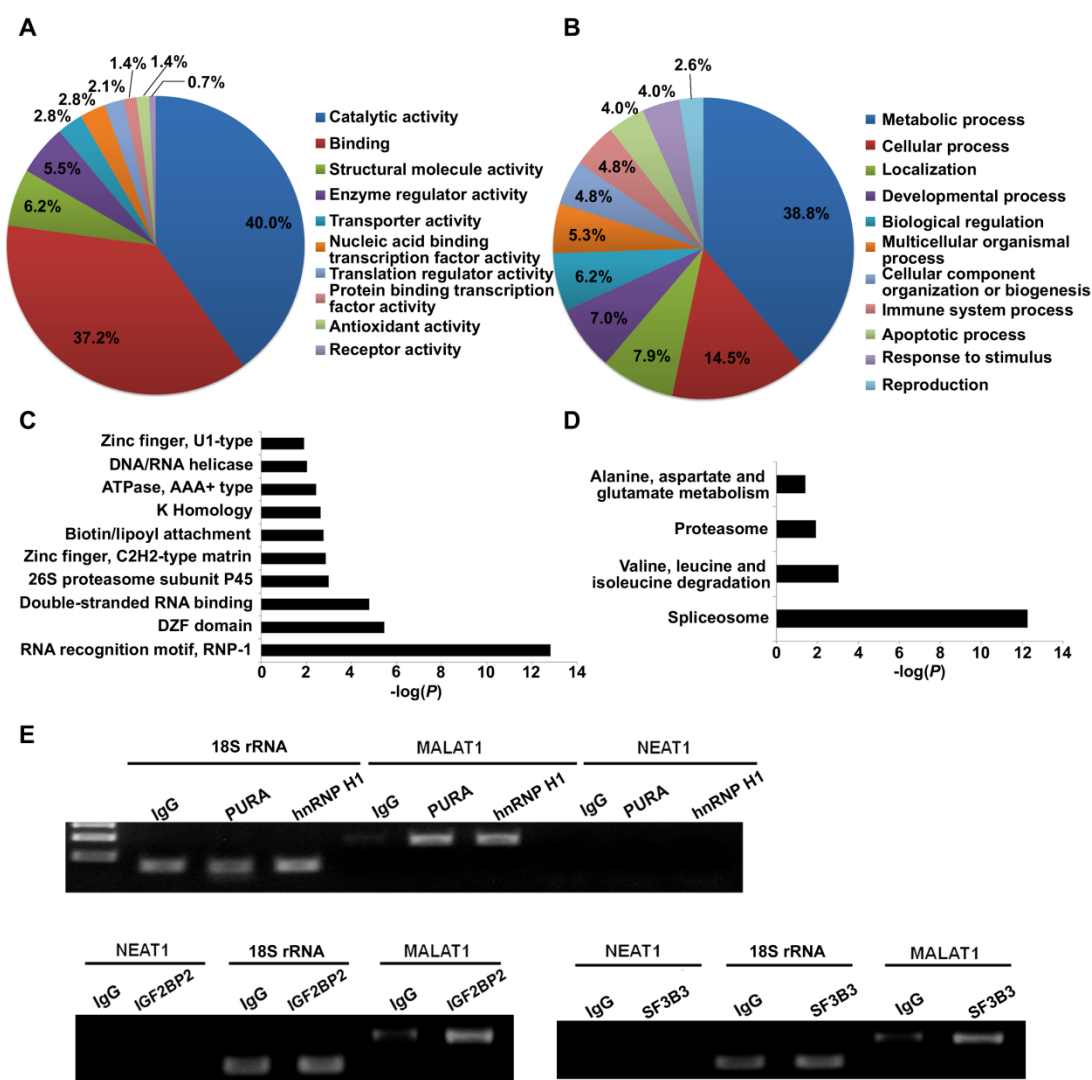

Supplemental Figure S2. Gene ontology analysis of the identified MALAT1-interacting proteins and the validation using RNA immunoprecipitation (RIP). (A) Diagram showing the molecular functions of the identified MALAT1-interacting proteins. (B) Diagram showing the related biological processes of the identified MALAT1-interacting proteins. The annotation information was acquired through the Panther database (<http://www.pantherdb.org>). Bar graphs present the  $P$  values of the enriched protein domains (C) and signaling pathways (D). The protein domain and pathway analyses were performed using DAVID (<https://david.ncifcrf.gov/>). (E) Agarose gel electrophoresis analysis of the qRT-PCR products of MALAT1, 18S rRNA and NEAT1 in the immunoprecipitates of the selected proteins. IgG was used as negative control.

Supplementary Figure S3

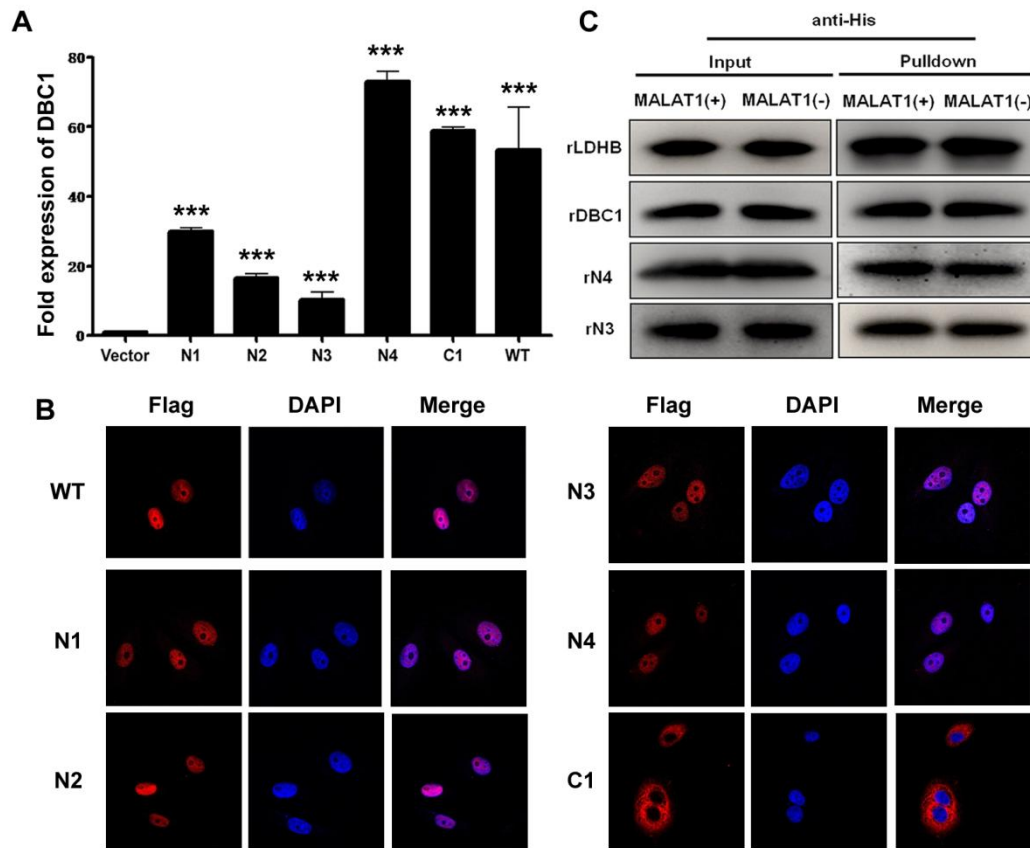

Supplementary Figure S3. Expression and localization of the DBC1 fragment constructs in the HepG2 cells. **(A)** qRT-PCR analysis of the mRNA levels of different DBC1 constructs. Data represent the means  $\pm$  SD of triplicate independent analyses ( $***P < 0.001$ , by student's *t*-test). **(B)** Immunofluorescence analysis of the subcellular localization of DBC1 fragments. HepG2 cells transfected with Flag-tagged DBC1 fragments or full-length DBC1 constructs were stained for Flag (red). Cell nuclei were stained with DAPI (blue). Cells were visualized with confocal laser scanning microscopy. **(C)** Western blots of the purified proteins in the input and pulldown samples for the *in vitro* His-tag pulldown assay.

Supplementary Figure S4

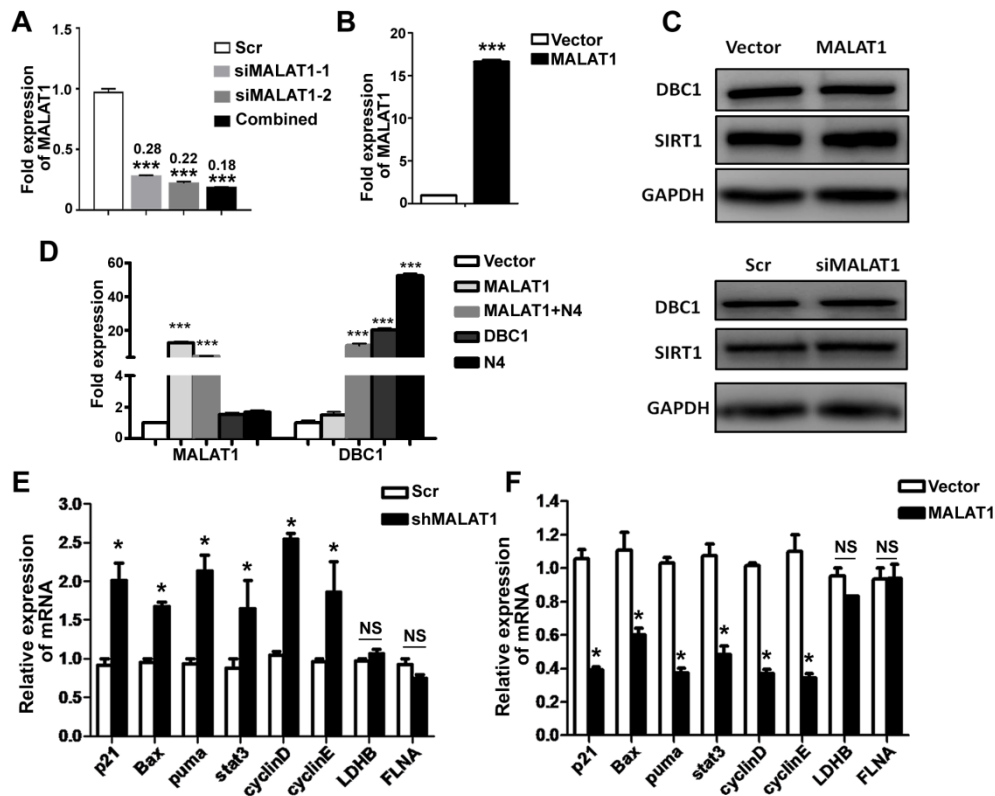

Supplementary Figure S4. (A) The efficiencies of MALAT1 knockdown using two siRNAs were examined by qRT-PCR. Data represent the means  $\pm$ SD of triplicate independent analyses ( $***P < 0.001$ , by student's *t*-test). (B) The efficiency of MALAT1 overexpression was examined by qRT-PCR. Data represent means  $\pm$ SD of triplicate independent analyses ( $***P < 0.001$ , by student's *t*-test). (C) Western blot analysis of DBC1 and SIRT1 in HepG2 cells with MALAT1 overexpression or knockdown. GAPDH was used as internal standard. (D) qRT-PCR analysis of the MALAT1, DBC1, and DBC1-N4 mRNA levels in the rescue experiments. Data represent the means  $\pm$ SD of triplicate independent analyses ( $***P < 0.001$ , by one-way ANOVA). The mRNA levels of p53 target genes, lactate dehydrogenase B (LDHB), and filamin A (FLNA) in the HepG2 cells with MALAT1 overexpression (E) and knockdown (F) were examined using qRT-PCR analysis. Data represent the means  $\pm$ SD of triplicate independent analyses ( $*P < 0.05$ ; NS, not significant; by student's *t*-test).

Supplementary Figure S5

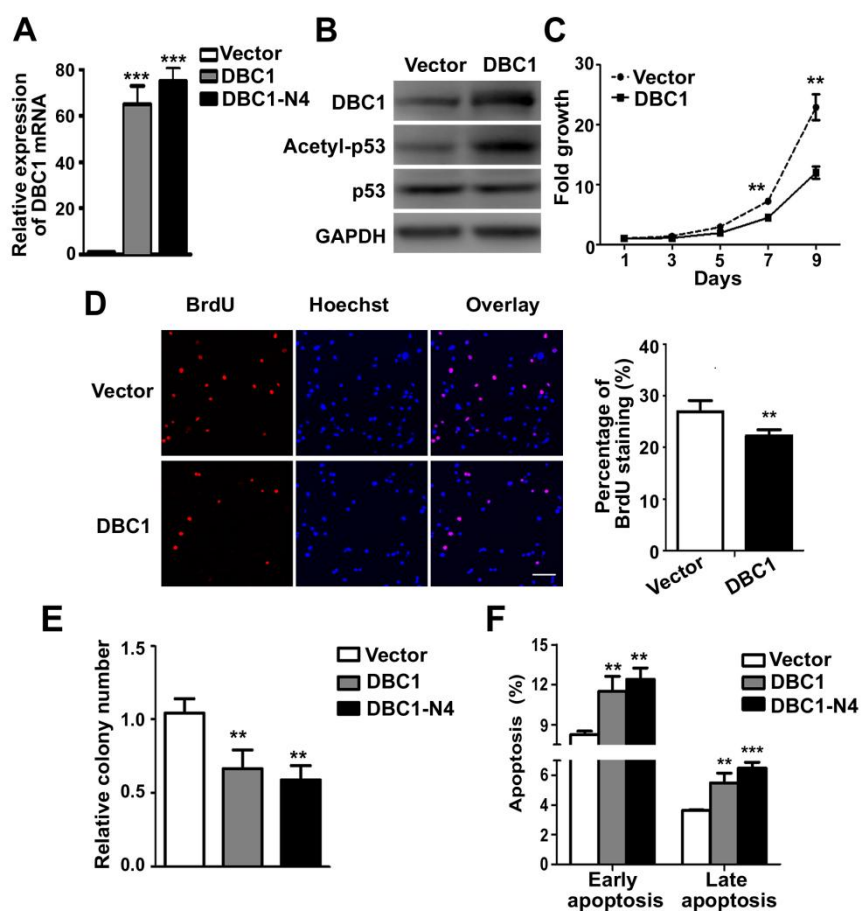

**Supplementary Figure S5.** DBC1 and DBC1-N4 inhibit cell proliferation and promote apoptosis. (A) The overexpression of DBC1 and DBC1-N4 was examined by qRT-PCR. Data represent the means  $\pm$  SD of triplicate independent analyses ( $***P < 0.001$ , by student's *t*-test). (B) Western blot analysis indicates that DBC1 overexpression increases p53 acetylation. GAPDH expression was used as a control. (C) Growth curve assay using DBC1-overexpressing HepG2 cells. Data represent the means  $\pm$  SD of triplicate independent analyses ( $**P < 0.01$ , by repeated measures ANOVA). (D) BrdU incorporation analysis using DBC1-overexpressing HepG2 cells. Histogram shows the means  $\pm$  SD from two independent experiments ( $**P < 0.01$ , by student's *t*-test). (E) Colony-formation assay was performed to study the proliferation of HepG2 cells overexpressing full-length DBC1 or DBC1-N4, and their corresponding control cells. Data represent the means  $\pm$  SD of two independent analyses ( $**P < 0.01$ , by one-way ANOVA). (F) Apoptosis analysis of HepG2 cells overexpressing full length DBC1 or DBC1-N4. Apoptotic cells were detected by Annexin V/PI staining assay and examined by flow cytometry. Data represent the means  $\pm$  SD of triplicate independent analyses ( $**P < 0.01$ ,  $***P < 0.001$ , by one-way ANOVA ).
